# Supplementary material for: Long-Term Efficacy, Survival, and Safety of [177Lu-DOTA0,Tyr3]octreotate in Patients with Gastroenteropancreatic and Bronchial Neuroendocrine Tumors
Source: Oxford University Press journal article supplement (doi:10.1158/1078-0432.ccr-16-2743), 2017-04-20

Supplement Figure 1.

Median overall survival for patients receiving a cumulative dose of ≥100 mCi 177Lu-DOTATATE with a primary NET located in the midgut with and without progression at baseline.


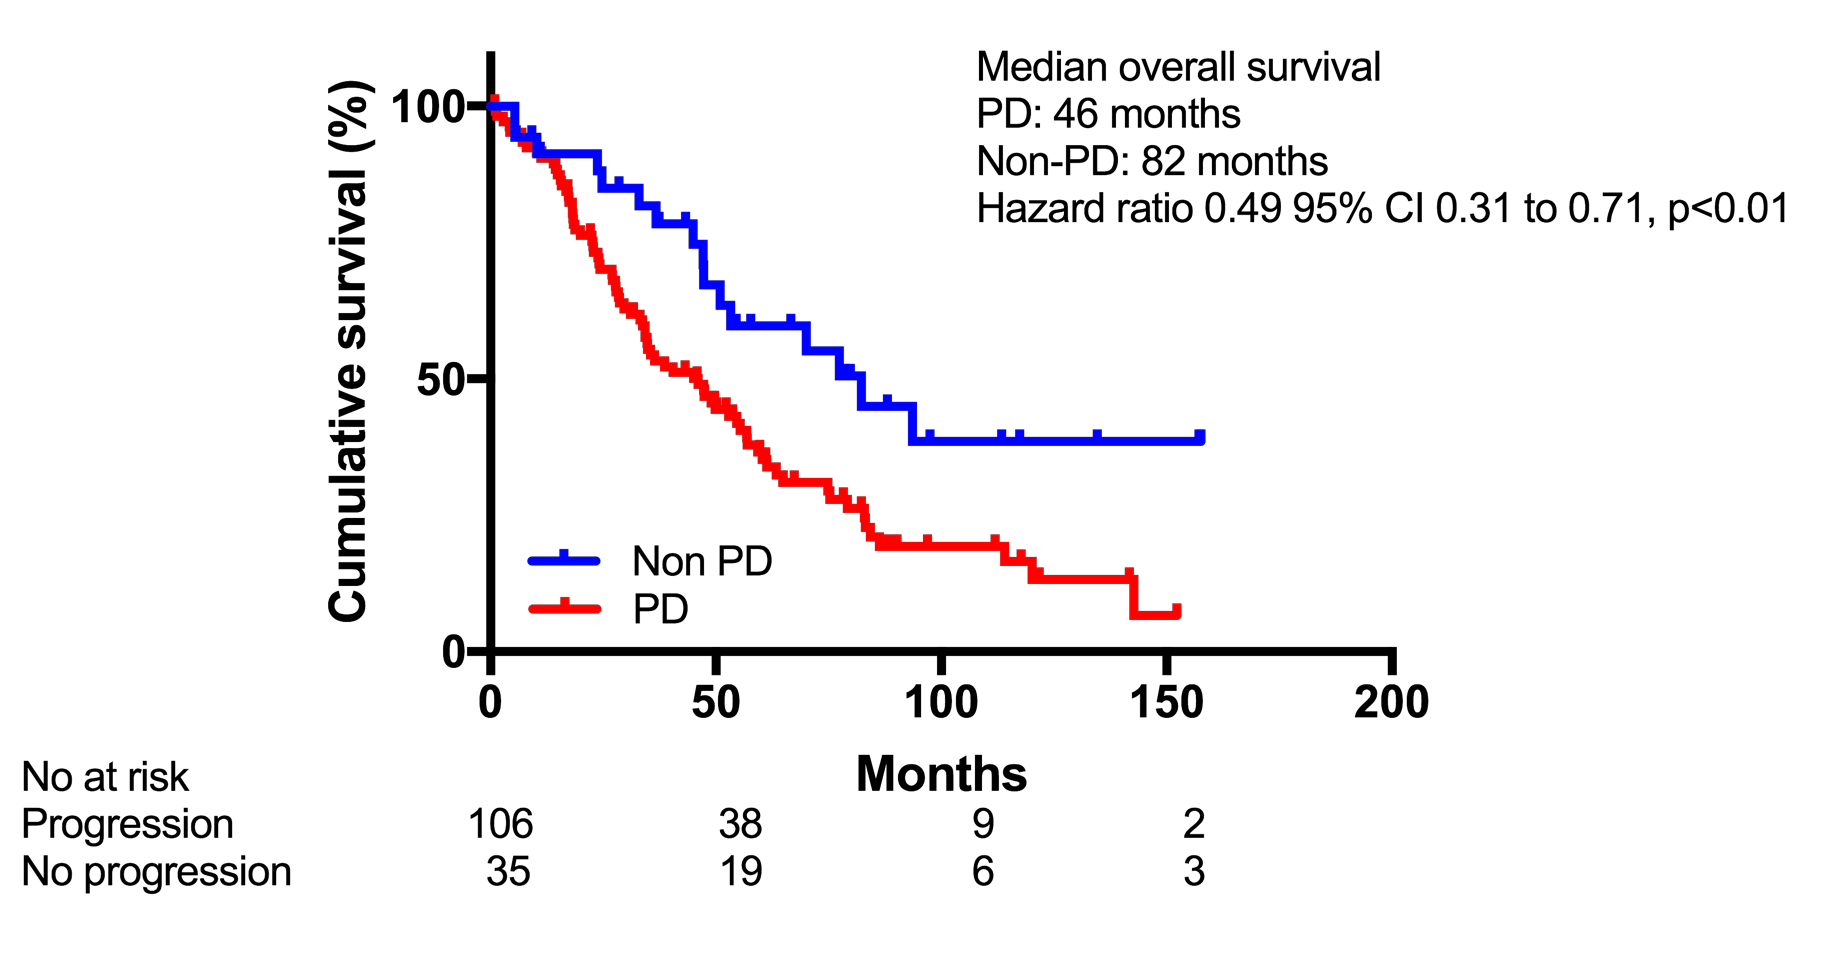

Supplement: 10780432ccr162743-sup-173974_3_supp_3961331_lnxls2.docx [file 10780432ccr162743-sup-173974_3_supp_3961331_lnxls2.docx]
